# Supplementary material for: Central Pain in Parkinson's Disease: Behavioral and Cognitive Characteristics
Source: Parkinsons Dis. 2021 Jun 10;2021:5553460. doi: 10.1155/2021/5553460 (PMC8211520; doi:10.1155/2021/5553460)
Supplement: Supplementary Materials — Table 1: Clinical classification of painful or unpleasant sensations in PD. Semistructured questionnaire for painis also provided. [file 5553460.f1.zip]

Archive with 2 entries (2 files):
- 5553460.f1/Supplementary material - Semi-structured questionnaire for pain (2).docx
- 5553460.f1/Supplementary material Table 1.docx
